# Supplementary material for: Self-templated synthesis of Co3O4 hierarchical nanosheets from a metal–organic framework for efficient visible-light photocatalytic CO2 reduction
Source: Royal Society of Chemistry journal article supplement (doi:10.1039/c9nr08669b), 2019-11-18
Supplement: c9nr08669b1.pdf [file c9nr08669b1.pdf]

*Electronic Supplementary Information*

**Self-templated synthesis of Co<sub>3</sub>O<sub>4</sub> hierarchical nanosheets from a metal-organic framework for efficient visible-light photocatalytic CO<sub>2</sub> reduction**

Jia-Tong Ren, Ya-Li Zheng, Kun Yuan, Liang Zhou, Ke Wu and Ya-Wen Zhang\*

Beijing National Laboratory for Molecular Sciences, State Key Laboratory of Rare Earth Materials Chemistry and Applications, PKU-HKU Joint Laboratory in Rare Earth Materials and Bioinorganic Chemistry, College of Chemistry and Molecular Engineering, Peking University, Beijing 100871, China. Fax: +86-10-62756787; Tel: +86-10-62756787; Email: ywzhang@pku.edu.cn

## Experimental section

### Chemicals

$\text{Co}(\text{Ac})_2 \cdot 4\text{H}_2\text{O}$  (A.R., Alfa Aesar Chemical Co. Ltd), 1,4-naphthalenedicarboxylic acid (1,4- $\text{H}_2\text{NDC}$ , A.R., Aladdin), isophthalic acid ( $\text{H}_2\text{IPA}$ , A.R., Aladdin),  $[\text{Ru}(\text{bpy})_3]\text{Cl}_2 \cdot 6\text{H}_2\text{O}$  (bpy = 2,2'-bipyridine, A.R., Adamas Reagent Co. Ltd.) N, N-dimethylformamide (DMF, A.R., Xilong Chemical Co. Ltd), acetonitrile ( $\text{CH}_3\text{CN}$ , A. R., Beijing Tongguang Fine Chemicals Company), triethanolamine (TEOA, A.R., Beijing Tongguang Fine Chemicals Company), ethanol (A.R.) and deionized water (Millipore,  $18.2 \text{ M}\Omega \text{ cm}$ ) were used as received. Commercial  $\text{Co}_3\text{O}_4$  was purchased from Shanghai Macklin Biochemical Co. Ltd.

### Synthesis of Co MOF nanosheets

Co MOF nanosheets (Co MOF NSs) with 1,4- $\text{H}_2\text{NDC}$  as the ligand were synthesized by a DMF-based oil bath method. Briefly, 1 mmol (249.0 mg) of  $\text{Co}(\text{Ac})_2 \cdot 4\text{H}_2\text{O}$  and 1 mmol (216.2 mg) of 1,4- $\text{H}_2\text{NDC}$  were mixed in 40 mL of DMF using a flask. The mixture turned into a purple suspension under stirring. After continuous stirring for 30 min, the flask was put into an oil bath ( $120^\circ\text{C}$ ) and heated for 2 h. After the resulting mixture was cooled to room temperature, the precipitate with a pinkish purple color was collected by centrifugation, washed with DMF and ethanol several times, and finally dried in vacuum at  $50^\circ\text{C}$ .

### Synthesis of $\text{Co}_3\text{O}_4$ hierarchical nanosheets

$\text{Co}_3\text{O}_4$  hierarchical nanosheets ( $\text{Co}_3\text{O}_4$  HNSs) were obtained by calcining the aforementioned Co MOF nanosheets in air at  $400^\circ\text{C}$  for 2 h with a heating rate of  $2^\circ\text{C min}^{-1}$ .

### Synthesis of Co MOF nanoballs and $\text{Co}_3\text{O}_4$ nanoparticles

Co MOF nanoballs (Co MOF NBs) were synthesized by the same procedure as Co MOF nanosheets except that 1 mmol (166.2 mg) of  $\text{H}_2\text{IPA}$  rather than 1,4- $\text{H}_2\text{NDC}$  were used in the synthesis.  $\text{Co}_3\text{O}_4$  nanoparticles ( $\text{Co}_3\text{O}_4$  NPs) were obtained by calcining the bluish purple Co MOF nanoballs in air at  $400^\circ\text{C}$  for 2 h with a heating rate of  $2^\circ\text{C min}^{-1}$ .

## Characterization

Scanning electron microscopy (SEM) was carried out using a FE-SEM (Hitachi S-4800, Japan). Transmission electron microscopy (TEM), high-resolution transmission electron microscopy (HRTEM), high-angle annular dark-field scanning transmission electron microscopy (HAADF-STEM) and energy-dispersive X-ray spectroscopy (EDS) were carried out using FEG-TEM (JEM-2100F, JEOL, Japan) operated at 200 kV. X-ray diffraction (XRD) patterns were obtained on a D2-PHASER diffractometer (Bruker, Germany) using Cu-K $\alpha$  radiation. Fourier transform infrared spectroscopy (FT-IR) was conducted on a Tensor-27 infrared spectrometer (Bruker, Germany) using KBr pellets.  $^1\text{H}$ -NMR tests were finished on a ARX-400 NMR Spectrometer (400 MHz, Bruker, Germany). Thermogravimetric analysis (TGA) was performed under atmospheric environment using a Q600 SDT TGA system (TA, USA). Ultraviolet photoelectron spectroscopy (UPS), X-ray photoelectron spectroscopy (XPS) and valence band X-ray photoelectron spectroscopy (VB-XPS) analyses were performed on an AXIS Supra XPS spectrometer (Kratos, U.K.). The C 1s line at 284.8 eV was used to calibrate the binding energies. Nitrogen adsorption–desorption isotherm experiments were performed at 77 K on an Accelerated Surface Area & Porosimetry system (ASAP 2010, Micromeritics, USA) to determine the Brunauer–Emmett–Teller (BET) surface area and pore size distribution. CO<sub>2</sub> adsorption experiments were conducted on Autosorb-iQ automated gas sorption analyzer (Quantachrome, USA) at 303 K. UV-Vis-NIR diffuse reflectance spectra (UV-Vis-NIR DRS) were acquired using a UV-3600 Plus UV-Vis-NIR spectrometer (Shimadzu, Japan) equipped with an integrating sphere and BaSO<sub>4</sub> was used as a reference. Photoluminescence (PL) spectra were obtained using a FLS980 steady-state and time-resolved fluorescence spectrometer (Edinburgh Instruments, U.K.) at room temperature. Time-resolved PL decay spectra were recorded at 615 nm under the excitation of a 450 nm laser source. For steady-state PL spectra, the excitation wavelength was 450 nm from a Xe lamp. Electrochemical impedance spectroscopy (EIS) measurements were performed in a standard three-electrode system. A Pt plate and a KCl-saturated Ag/AgCl electrode were used as the counter and the reference electrode, respectively. The working electrode was a glassy carbon electrode (diameter of 5 mm) prepared by dropping 20  $\mu\text{L}$  of sample-ethanol suspension (2.5 mg mL<sup>-1</sup>) and 5  $\mu\text{L}$  of Nafion solution (0.5

wt%) followed by fast drying. Electron paramagnetic resonance (EPR) analysis was carried out on a Bruker Elexsys E580 X-band EPR spectrometer (Bruker, Germany) at room temperature.

### **Photocatalytic CO<sub>2</sub> reduction**

A quartz photoreactor attached to a closed photocatalytic system equipped with an online gas chromatograph (GC-7806) was used to evaluate the activity of photocatalytic CO<sub>2</sub> reduction. 20 mg of [Ru(bpy)<sub>3</sub>]Cl<sub>2</sub>·6H<sub>2</sub>O and 20 mg of the catalyst were suspended in a mixture of CH<sub>3</sub>CN, H<sub>2</sub>O and TEOA (3:1:1 in volume, 60 mL in total) under stirring. The temperature of the reactor was kept at 288 K by circulating cooling water. Before light irradiation, the system was evacuated and filled with high-purity CO<sub>2</sub> (99.999 %) three times to remove the air inside thoroughly. CO<sub>2</sub> was then continuously bubbled into the test liquid for 1 h with a flow velocity of 100 mL min<sup>-1</sup>, which was aimed to ulteriorly ensure the complete removal of air and to facilitate the sufficient dissolution of CO<sub>2</sub>. Finally, the reactor was illuminated by a 300 W Xe lamp (Microsolar 300, PerfectLight) equipped with a UV cut-off filter ( $\lambda > 400$  nm). The distance between the light source and the liquid level was approximately 11 cm, and the light intensity is approximately 500 mW cm<sup>-2</sup>. During the reaction process, the pressure inside the system was approximately 1 bar. CO and H<sub>2</sub> were detected by a flame ionization detector (FID) and a thermal conductivity detector (TCD), respectively. Ar was used as the carrier gas. A 7980A/5975C GC-MS (Agilent, USA) was used to analyze the products of the <sup>13</sup>CO<sub>2</sub> isotope photocatalytic experiment. For the photocatalytic recycling test, the as-tested photocatalyst was collected by centrifugation and washed with CH<sub>3</sub>CN once. After that, it was used again for the next cycle.

The apparent quantum efficiency (AQE) of Co<sub>3</sub>O<sub>4</sub> hierarchical nanosheets for CO production (AQE-CO) was measured using a monochromatic irradiation light at a specific wavelength by a 300 W Xe lamp equipped with a band-pass filter. The rest of the process was identical with the normal test. AQE-CO was calculated as follows:

$$\text{AQE - CO} = \frac{\text{number of generated CO} \times 2}{\text{number of incident photons}} \times 100 \%$$

$$= \frac{n_{\text{CO}} \times N_{\text{A}} \times 2}{PSt\lambda/hc} \times 100 \%$$

Wherein,  $n_{\text{CO}}$  is the mole number of generated CO;  $N_{\text{A}}$  is the Avogadro's constant ( $6.02 \times 10^{23} \text{ mol}^{-1}$ );  $P$  is the power of Xe lamp at the wavelength;  $S$  is the illumination area ( $\sim 16 \text{ cm}^2$ );  $t$  is the photocatalytic reaction time (9000 s),  $\lambda$  is the wavelength;  $h$  is the Planck constant ( $6.626 \times 10^{-34} \text{ J s}^{-1}$ );  $c$  is the speed of light ( $3 \times 10^8 \text{ m s}^{-1}$ ). AQE for  $\text{H}_2$  production (AQE- $\text{H}_2$ ) was also obtained during the same process and calculated using the similar formula except that  $n_{\text{CO}}$  was substituted by  $n_{\text{H}_2}$  (the mole number of generated  $\text{H}_2$ ). Total AQE was the sum of AQE-CO and AQE- $\text{H}_2$ .

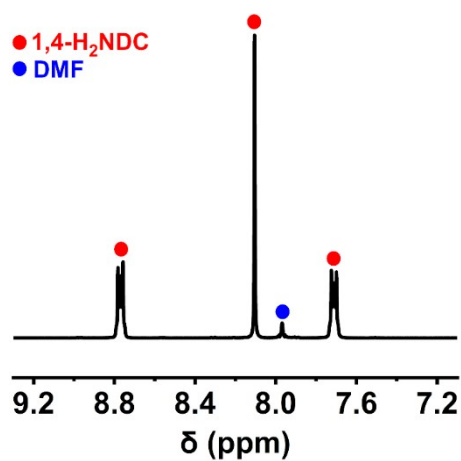

**Figure S1.**  $^1\text{H}$ -NMR spectrum of the Co MOF formed before oil bath with 1,4- $\text{H}_2\text{NDC}$  as the organic linker.

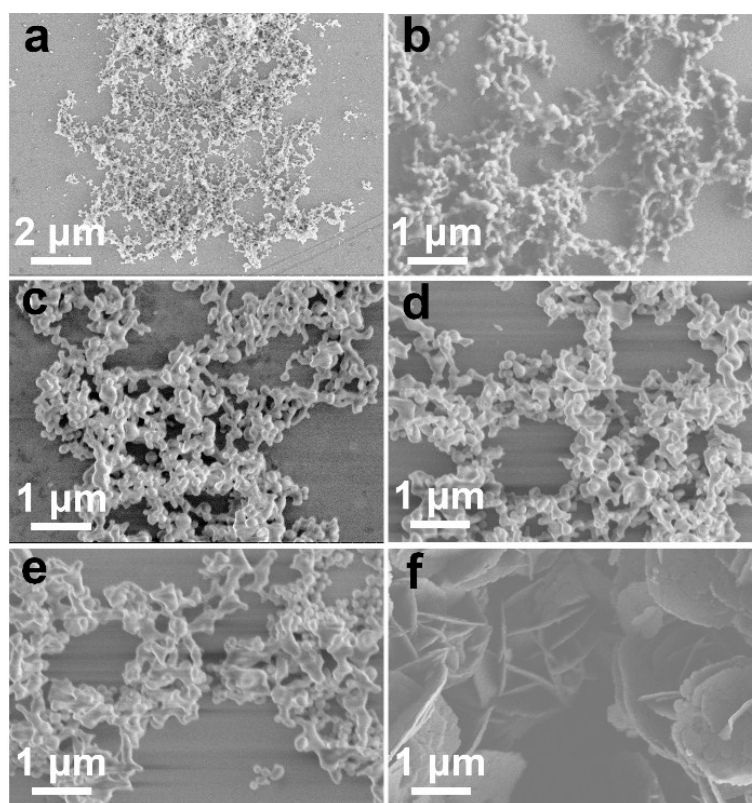

**Figure S2.** SEM images of Co MOF with 1,4- $\text{H}_2\text{NDC}$  as the organic linker at (a) 0 min, (b) 10 min, (c) 20 min, (d) 30 min, (e) 60 min and (f) 120 min during the synthetic process.

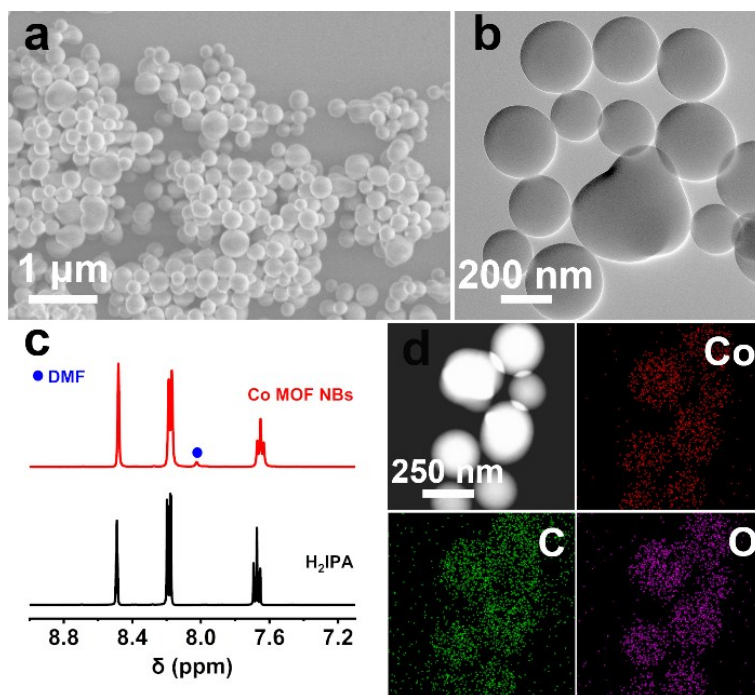

**Figure S3.** (a) SEM, (b) TEM and (d) EDS mapping images of Co MOF NBs with H<sub>2</sub>IPA as the organic linker; (c) <sup>1</sup>H-NMR spectra of Co MOF NBs and H<sub>2</sub>IPA.

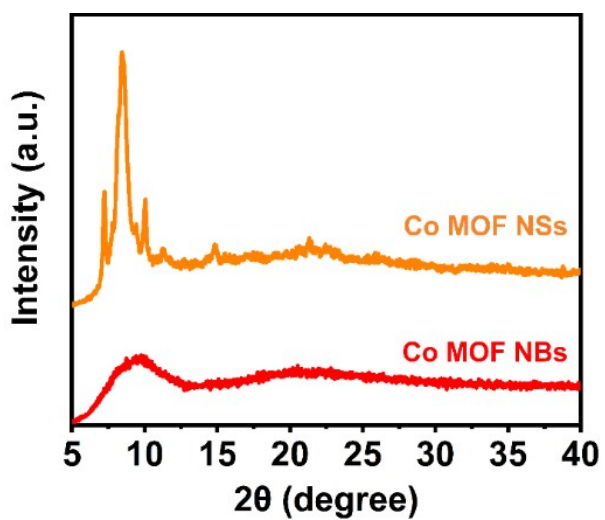

**Figure S4.** XRD patterns of Co MOF NSs and NBs.

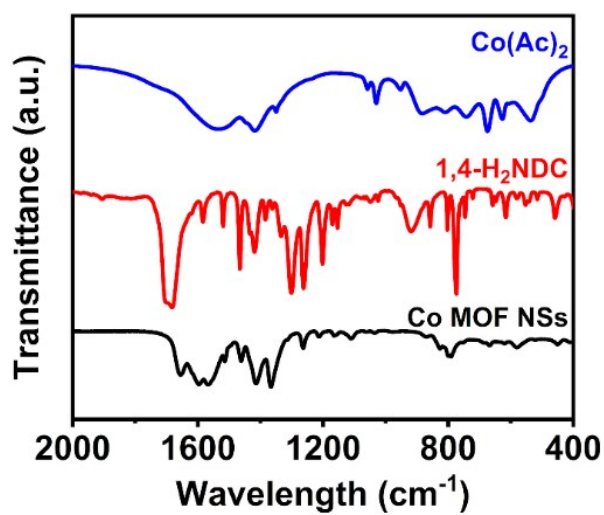

**Figure S5.** FT-IR spectra of Co MOF NSs as well as 1,4-H<sub>2</sub>NDC and Co(Ac)<sub>2</sub>.

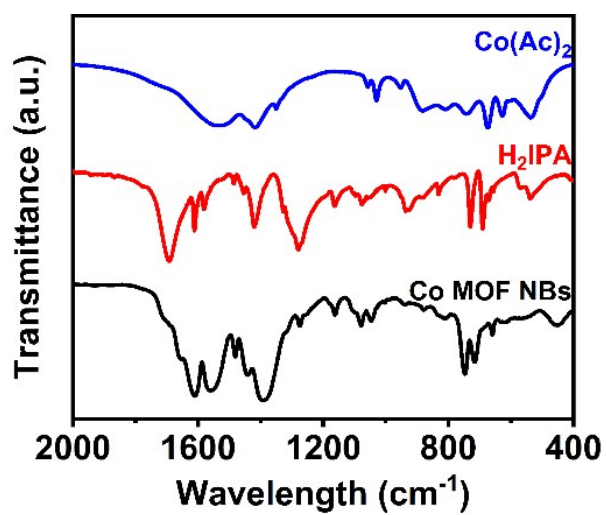

**Figure S6.** FT-IR spectra of Co MOF NBs as well as H<sub>2</sub>IPA and Co(Ac)<sub>2</sub>.



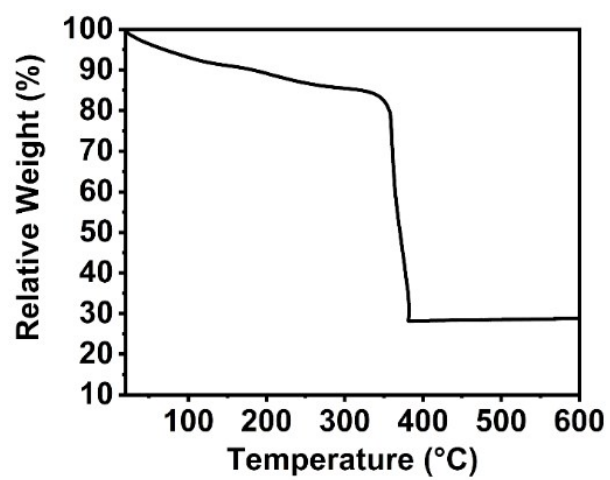

**Figure S7.** TG curve of Co MOF NSs in air.

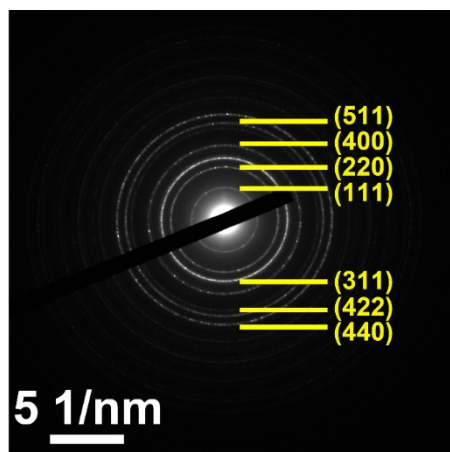

**Figure S8.** SAED pattern of  $\text{Co}_3\text{O}_4$  HNSs.

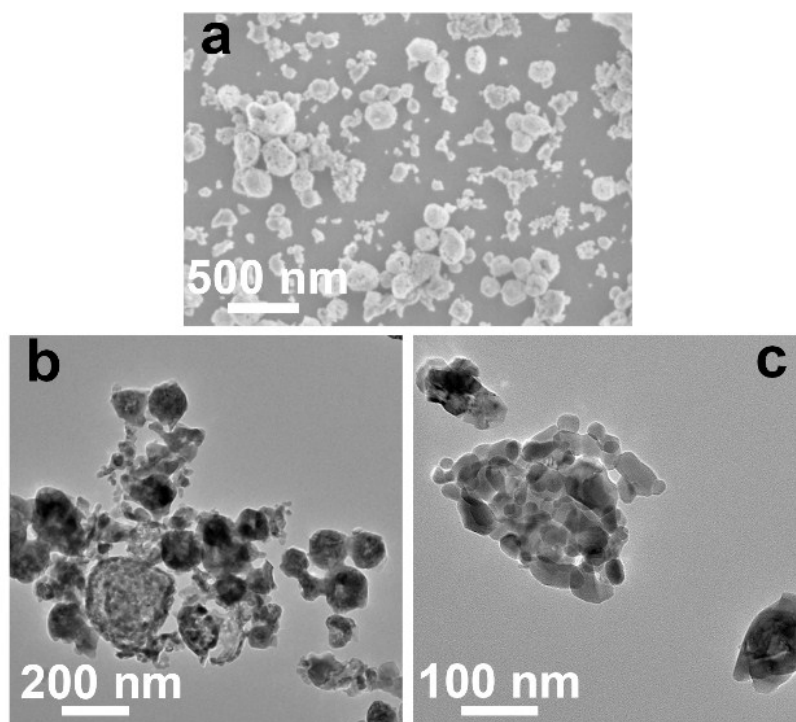

**Figure S9.** (a) SEM and (b, c) TEM images of  $\text{Co}_3\text{O}_4$  NPs obtained by calcining Co MOF NBs.

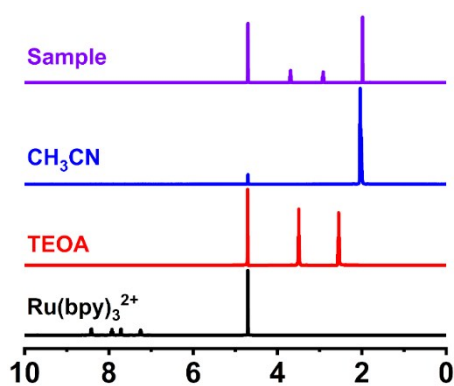

**Figure S10.**  $^1\text{H}$ -NMR spectra of  $\text{Ru}(\text{bpy})_3^{2+}$ , TEOA,  $\text{CH}_3\text{CN}$  and the sample taken from the reaction mixture after photocatalytic reaction catalyzed by  $\text{Co}_3\text{O}_4$  HNSs.

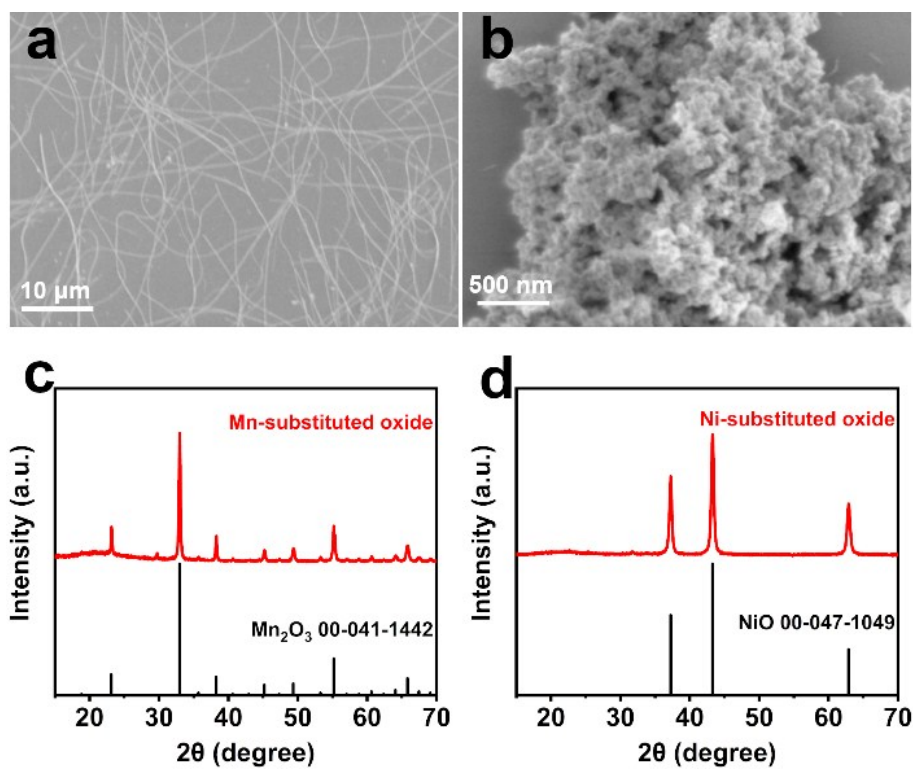

**Figure S11.** (a) SEM image and (c) XRD pattern of Mn-substituted calcined product; (b) SEM image and (d) XRD pattern of Ni-substituted calcined product. The synthetic process was similar with  $\text{Co}_3\text{O}_4$  HNSs except that  $\text{Co}(\text{Ac})_2 \cdot 4\text{H}_2\text{O}$  was replaced by  $\text{Mn}(\text{Ac})_2 \cdot 4\text{H}_2\text{O}$  or  $\text{Ni}(\text{Ac})_2 \cdot 4\text{H}_2\text{O}$ .

**Table S1.** Comparison of performance towards photocatalytic CO<sub>2</sub> reduction between Co<sub>3</sub>O<sub>4</sub> HNSs and some newly-developed photocatalysts.

| Catalyst                                                                      | Light source                             | T<br>(°C) | Photosensitizer<br>/Cocatalyst                | Solvent system                            | Products<br>(μmol h <sup>-1</sup> )<br>/Selectivity | Ref.                 |
|-------------------------------------------------------------------------------|------------------------------------------|-----------|-----------------------------------------------|-------------------------------------------|-----------------------------------------------------|----------------------|
| <b>Co<sub>3</sub>O<sub>4</sub> HNSs</b>                                       | <b>300 W Xe lamp<br/>(λ &gt; 400 nm)</b> | <b>15</b> | <b>Ru(bpy)<sub>3</sub><sup>2+</sup><br/>/</b> | <b>MeCN/H<sub>2</sub>O/TEOA<br/>3:1:1</b> | <b>CO: 39.70<br/>77.3 %</b>                         | <b>This<br/>work</b> |
| Metallic Co/C                                                                 | 300 W Xe lamp (λ<br>> 420 nm)            | 15        | Ru(bpy) <sub>3</sub> <sup>2+</sup><br>/       | MeCN/H <sub>2</sub> O/TEOA<br>3:1:1       | CO: 9.36<br>64.21 %                                 | 1                    |
| Co <sub>3</sub> O <sub>4</sub> holey<br>nanosheets                            | 5 W LED lamp<br>(400-1000 nm)            |           | Ru(bpy) <sub>3</sub> <sup>2+</sup><br>/       | MeCN/H <sub>2</sub> O/TEOA<br>3:2:1       | CO: 4.52 70.1<br>%                                  | 2                    |
| Leaf-like ZIF-67                                                              | 300 W Xe lamp (λ<br>> 400 nm)            | 30        | Ru(bpy) <sub>3</sub> <sup>2+</sup><br>/       | MeCN/H <sub>2</sub> O/TEOA<br>4:1:1       | CO: 3.89 ~64<br>%                                   | 3                    |
| Carbonized<br>Zn/Co ZIF                                                       | 100 W LED lamp<br>(λ > 420 nm)           | 4         | Ru(bpy) <sub>3</sub> <sup>2+</sup><br>/       | MeCN/H <sub>2</sub> O/TEOA<br>5:1:1       | CO: 22 ~58<br>%                                     | 4                    |
| NC@NiCo <sub>2</sub> O <sub>4</sub>                                           | 300 W Xe lamp (λ<br>> 420 nm)            | 30        | Ru(bpy) <sub>3</sub> <sup>2+</sup><br>/       | MeCN/H <sub>2</sub> O/TEOA<br>3:2:1       | CO: 26.2 88.6<br>%                                  | 5                    |
| LaCoO <sub>3</sub>                                                            | 300 W Xe lamp (λ<br>> 420 nm)            | 30        | Ru(bpy) <sub>3</sub> <sup>2+</sup><br>/       | MeCN/H <sub>2</sub> O/TEOA<br>3:2:1       | CO: 44.2 78.0<br>%                                  | 6                    |
| Hollow multi-shelled<br>Co <sub>3</sub> O <sub>4</sub> dodecahedron           | 200 W Xe lamp<br>(AM 1.5G)               |           | /                                             | H <sub>2</sub> O                          | CO: 0.232                                           | 7                    |
| Ni-doped ZnCo <sub>2</sub> O <sub>4</sub>                                     | 300 W Xe lamp<br>(AM 1.5G)               | 25        | /                                             | H <sub>2</sub> O                          | CO: 0.628<br>CH <sub>4</sub> : 0.404                | 8                    |
| CsPbBr <sub>3</sub> QDs/g-C <sub>3</sub> N <sub>4</sub>                       | 300 W Xe lamp (λ<br>> 420 nm)            | 20        | /                                             | MeCN/H <sub>2</sub> O                     | CO: 1.19<br>~100 %                                  | 9                    |
| ZnIn <sub>2</sub> S <sub>4</sub> -In <sub>2</sub> O <sub>3</sub><br>nanotubes | 300 W Xe lamp (λ<br>> 400 nm)            | 30        | /                                             | MeCN/H <sub>2</sub> O/TEOA<br>3:2:1       | CO: 12.3 ~81<br>%                                   | 10                   |
| Au@CdS hollow<br>particles                                                    | 300 W Xe lamp (λ<br>> 400 nm)            | 30        | /                                             | MeCN/H <sub>2</sub> O/TEOA<br>3:2:1       | CO: 15.03<br>70.3 %                                 | 11                   |

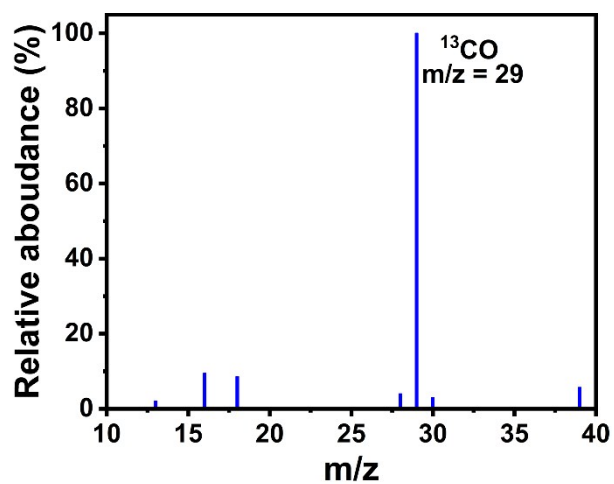

**Figure S12.** Mass spectrum of GC-MS analysis for the produced CO from the  $^{13}\text{CO}_2$  isotope photocatalytic experiment using  $\text{Co}_3\text{O}_4$  HNSs as the catalyst.

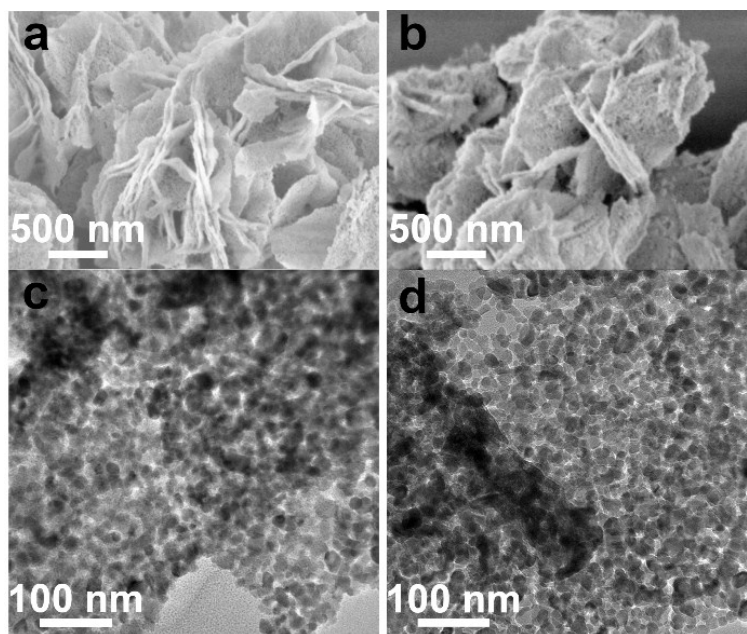

**Figure S13.** Electron microscope images of  $\text{Co}_3\text{O}_4$  HNSs (a, c) before and (b, d) after the photocatalytic cyclic test.

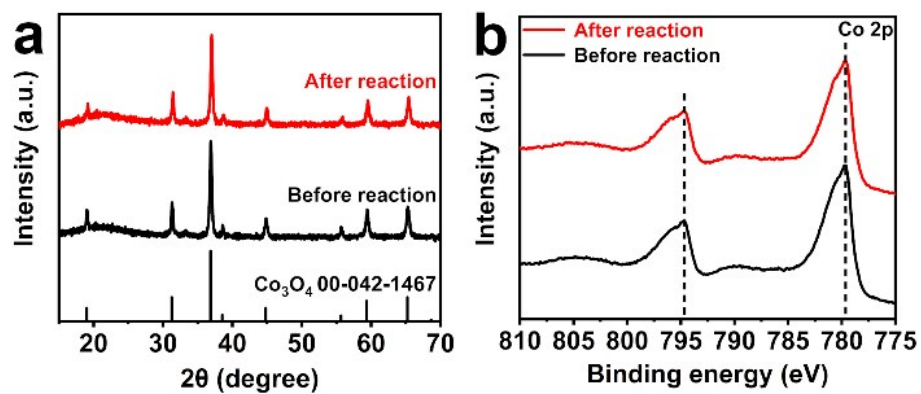

**Figure S14.** (a) XRD patterns and (b) Co 2p XPS spectra of  $\text{Co}_3\text{O}_4$  HNSs before and after the photocatalytic cyclic test.

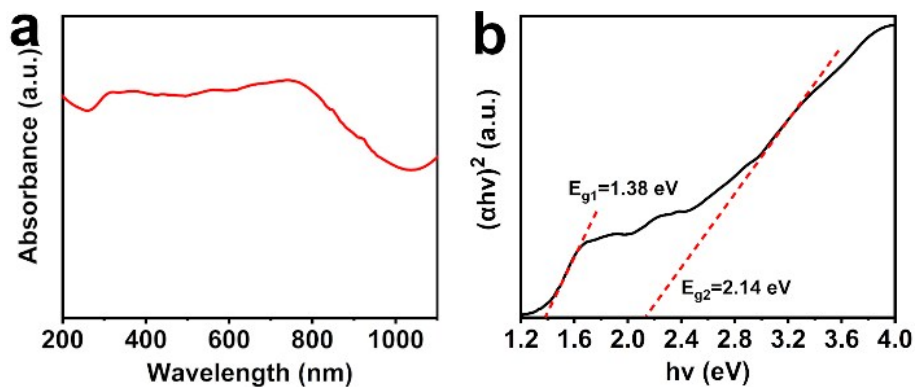

**Figure S15.** (a) UV-Vis-NIR diffuse reflectance spectrum and (b) Tauc plot of  $\text{Co}_3\text{O}_4$  HNSs.

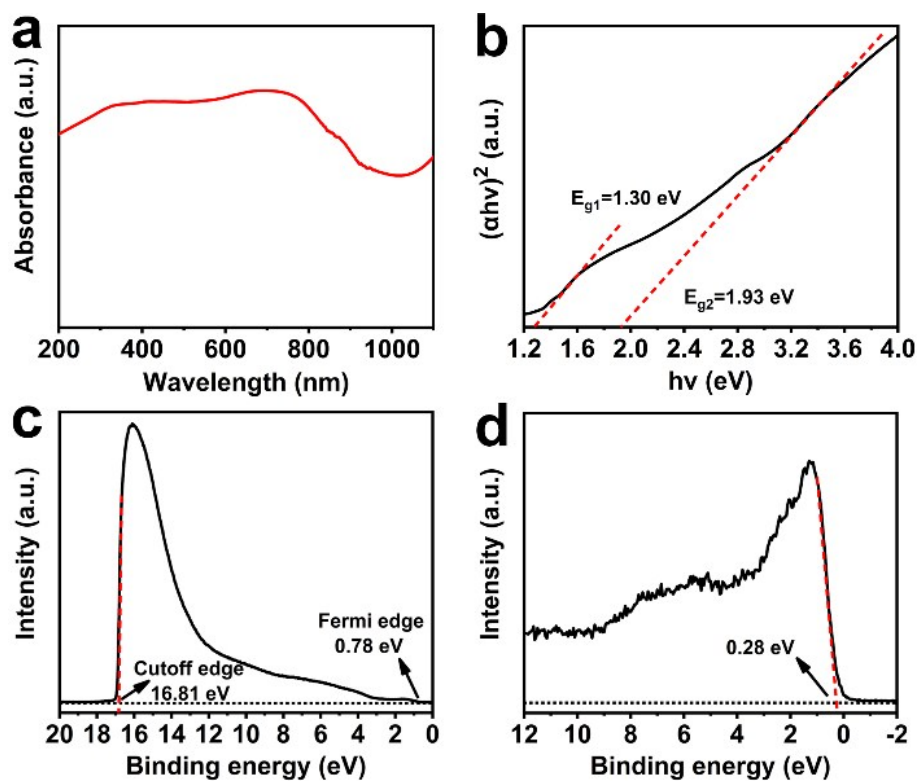

**Figure S16.** (a) UV-Vis-NIR diffuse reflectance spectrum, (b) Tauc plot, (c) UPS spectrum and (d) VB-XPS spectrum of  $\text{Co}_3\text{O}_4$  NPs.

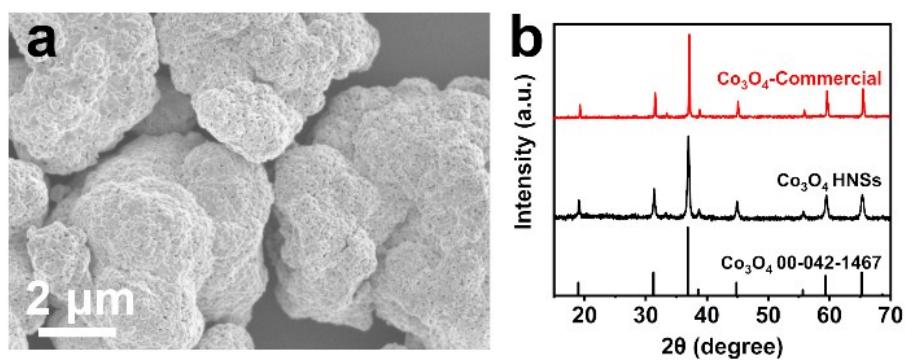

**Figure S17.** (a) SEM image and (b) XRD pattern of commercial  $\text{Co}_3\text{O}_4$ .

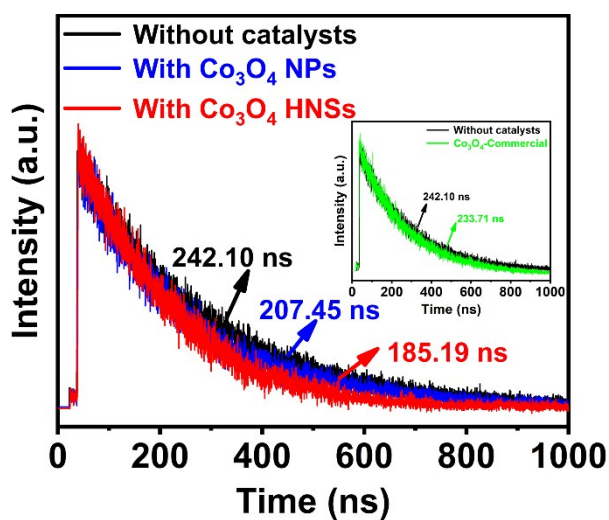

**Figure S18.** Time-resolved PL decay spectra of the solvent system without or with different  $\text{Co}_3\text{O}_4$  photocatalysts. Inset is the comparison of PL lifetime between the solvent system without catalysts and with commercial  $\text{Co}_3\text{O}_4$ .

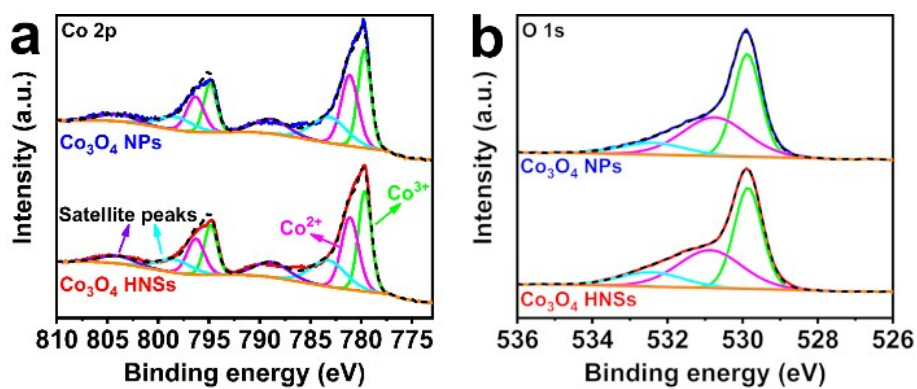

**Figure S19.** (a) Co 2p and (b) O 1s XPS spectra of  $\text{Co}_3\text{O}_4$  HNSs and  $\text{Co}_3\text{O}_4$  NPs.



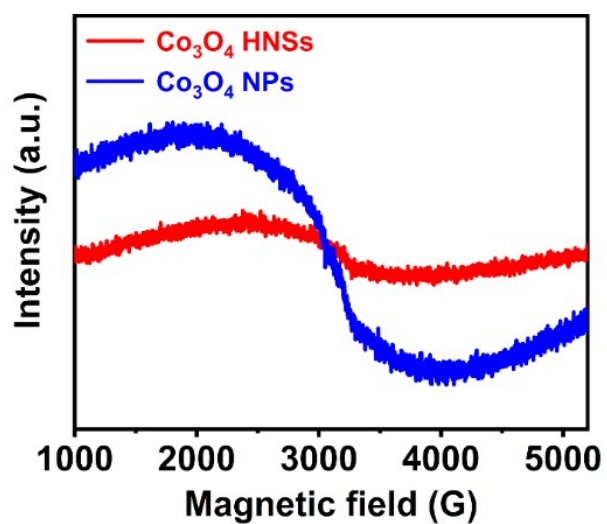

**Figure S20.** Room-temperature EPR spectra of  $\text{Co}_3\text{O}_4$  HNSs and  $\text{Co}_3\text{O}_4$  NPs.

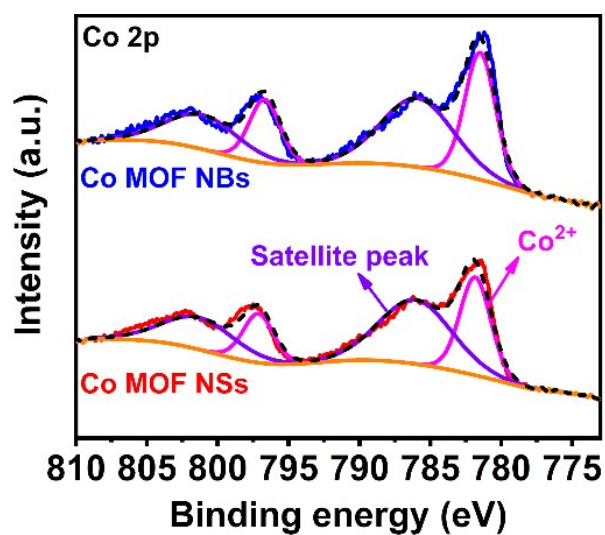

**Figure S21.** Co 2p XPS spectra of Co MOF NSs and Co MOF NBs.

## Supplementary references

- 1 K. Zhao, S. L. Zhao, C. Gao, J. Qi, H. J. Yin, D. Wei, M. F. Mideksa, X. L. Wang, Y. Gao, Z. Y. Tang and R. B. Yu, *Small*, 2018, **14**, 1800762.
- 2 W. Y. Chen, B. Han, C. Tian X. M. Liu, S. J. Liang H. Deng and Z. Lin, *Appl. Catal. B: Environ.*, 2019, **244**, 996–1003.
- 3 M. Wang, J. X. Liu, C. M. Guo, X. S. Gao, C. H. Gong, Y. Wang, B. Liu, X. X. Li, G. G. Gurzadyan and L. C. Sun, *J. Mater. Chem. A*, 2018, **6**, 4768–4775.
- 4 Q. Q. Mu, W. Zhu, G. B. Yan, Y. B. Lian, Y. Z. Yao, Q. Li, Y. Y. Tian, P. Zhang, Z. Deng and Y. Peng, *J. Mater. Chem. A*, 2018, **6**, 21110–21119.
- 5 S. B. Wang, B. Y. Guan and X. W. Lou, *Energy Environ. Sci.*, 2018, **11**, 306–310.
- 6 J. N. Qin, L. H. Lin and X. C. Wang, *Chem. Commun.*, 2018, **54**, 2272–2275.
- 7 L. Wang, J. W. Wan, Y. S. Zhao, N. L. Yang and D. Wang, *J. Am. Chem. Soc.*, 2019, **141**, 2238–2241.
- 8 K. T. Liu, X. D. Li, L. Liang, J. Wu, X. C. Jiao, J. Q. Xu, Y. F. Sun and Y. Xie, *Nano Res.*, 2018, **11**, 2897–2908.
- 9 M. Ou, W. G. Tu, S. M. Yin, W. N. Xing, S. Y. Wu, H. J. Wang, S. P. Wan, Q. Zhong and R. Xu, *Angew. Chem. Int. Ed.*, 2018, **57**, 13570–13574.
- 10 S. B. Wang, B. Y. Guan and X. W. Lou, *J. Am. Chem. Soc.*, 2018, **140**, 5037–5040.
- 11 P. Zhang, S. B. Wang, B. Y. Guan and X. W. Lou, *Energy Environ. Sci.*, 2019, **12**, 164–168.
